# Supplementary material for: Walking to work: roles for class V myosins as cargo transporters
Source: Springer Nature journal article supplement (doi:10.1038/nrm3248), 2011-12-07
Supplement: 41580_2012_BFnrm3248_MOESM1_ESM.pdf [file 41580_2012_BFnrm3248_MOESM1_ESM.pdf]

Supplementary information S1 (table) | **Evidence for class V myosin-dependent organelle transport in vivo**

| Organelle-type V myosin                             | Proposed function                                                                                                                                          | Colocalization with endogenous myosin | Colocalization with GFP-tagged myosin | Organelle and myosin colocalization during transport | Transport speed (nm s <sup>-1</sup> ) | Methods used to show defects in organelle movement and/or distribution in cells lacking class V myosin | Wild-type class V myosin complements the defects | Correlate organelle speed with mechanochemical properties of myosin V | Organelle receptor identified                  | Transport complex reconstituted in vitro | Regulatory mechanisms of motor:receptor complex identified                                                                    |
|-----------------------------------------------------|------------------------------------------------------------------------------------------------------------------------------------------------------------|---------------------------------------|---------------------------------------|------------------------------------------------------|---------------------------------------|--------------------------------------------------------------------------------------------------------|--------------------------------------------------|-----------------------------------------------------------------------|------------------------------------------------|------------------------------------------|-------------------------------------------------------------------------------------------------------------------------------|
| Secretory vesicles–yeast Myo2                       | Vectorial transport of the secretory vesicles that drives the growth of the bud                                                                            | Yes                                   | No                                    | Yes (IF)                                             | ~2500                                 | KO, DN                                                                                                 | Yes                                              | Yes                                                                   | Ypt31–Ypt32 and Sec4                           | No                                       | PtdIns4P levels, GEF for Sec4                                                                                                 |
| Late Golgi–yeast Myo2                               | Transport of late Golgi elements into the bud to facilitate inheritance of this compartment                                                                | Yes                                   | Yes                                   | No                                                   | ~220                                  | KO                                                                                                     | Yes                                              | No                                                                    | Ypt11 and Ret2                                 | No                                       | No                                                                                                                            |
| Vacuole–yeast Myo2                                  | Transport of portions of the vacuole into the bud to facilitate inheritance of this compartment                                                            | Yes                                   | No                                    | Yes (IF)                                             | ~150                                  | KO, DN                                                                                                 | Yes                                              | No                                                                    | Vac17 and Vac8                                 | No                                       | Cell cycle regulated synthesis, degradation and phosphorylation of Vac17                                                      |
| Peroxisomes–yeast Myo2                              | Transport of peroxisomes into the bud to facilitate inheritance of this compartment                                                                        | Yes                                   | No                                    | No                                                   | ~450                                  | KO                                                                                                     | Yes                                              | No                                                                    | Inp2                                           | No                                       | Cell cycle regulated synthesis and degradation and phosphorylation of Inp2, degradation of Inp2 controlled by positional cues |
| mRNAs–yeast Myo4                                    | Transport of mRNAs to the bud tip                                                                                                                          | Yes                                   | No                                    | No                                                   | ~300                                  | KO                                                                                                     | Yes                                              | No                                                                    | She3, She2                                     | Yes                                      | No                                                                                                                            |
| Pigment granules– <i>D. melanogaster</i> myosin V   | Transport of pigment granules within photoreceptor cells in response to light to create a functional pupil (sensory adaptation)                            | Yes                                   | No                                    | Yes (IF)                                             | ND                                    | KO                                                                                                     | Yes                                              | No                                                                    | Lightoid (RAB-like)                            | No                                       | Elevated Ca <sup>2+</sup>                                                                                                     |
| Secretory vesicles– <i>D. melanogaster</i> myosin V | Transport of secretory vesicles that support the growth of the sensory membrane at the rhabdomere                                                          | Yes                                   | No                                    | Yes (IF)                                             | ND                                    | KO                                                                                                     | No                                               | No                                                                    | RAB11 and RIP11                                | No                                       | No                                                                                                                            |
| Melanosome–mouse myosin Va                          | Capture and local movement of melanosomes in the cell periphery                                                                                            | Yes                                   | Yes                                   | Yes                                                  | ~150                                  | KO, RNAi, DN                                                                                           | Yes                                              | No                                                                    | RAB27A–melanophilin                            | Yes                                      | GEF and GAP for RAB27A, cargo-dependent unfolding and activation of myosin Va                                                 |
| Melanosome–frog myosin V                            | Capture and local movement of melanosomes in the central cytoplasm                                                                                         | Yes                                   | No                                    | No                                                   | ~50                                   | DN                                                                                                     | No                                               | No                                                                    | No, but most likely similar to mouse myosin Va | No                                       | Phosphorylation of myosin V's GTD                                                                                             |
| CV membranes– <i>D. discoideum</i> MyoJ             | Cortical capture of CV membranes and translocation of CV tubules following water discharge                                                                 | Yes                                   | Yes                                   | Yes                                                  | ~500                                  | KO, DN                                                                                                 | Yes                                              | Yes                                                                   | No                                             | No                                       | No                                                                                                                            |
| Recycling endosome–mouse myosin Vb                  | Activity-dependent transport of recycling endosomes onto the dendritic spines of hippocampal neurons to support functional and structural spine plasticity | Yes                                   | Yes                                   | Yes                                                  | ND                                    | DN, RNAi, chemical genetic mutant                                                                      | Yes                                              | No                                                                    | RAB11A, FIP2                                   | No                                       | Ca <sup>2+</sup> -dependent unfolding and activation of myosin Vb, GEF and GAP for RAB11                                      |
| SER– mouse myosin Va                                | Transport of SER tubules into the dendritic spines of cerebellar Purkinje neurons to support synaptic plasticity                                           | Yes                                   | Yes                                   | Yes                                                  | 400                                   | KO                                                                                                     | Yes                                              | Yes                                                                   | No                                             | No                                       | No                                                                                                                            |

CV, contractile vacuole; *D. discoideum*, *Dictyostelium discoideum*; *D. melanogaster*, *Drosophila melanogaster*; DN, dominant-negative construct in wild-type background; FIP2, RAB11 family-interacting protein 2; GAP, GTPase-activating protein; GEF, guanine nucleotide exchange factor; GFP, green fluorescent protein; GTD, globular tail domain; IF, immunofluorescence; Inp2, inheritance of peroxisomes 2; KO, knockout; ND, not determined; PtdIns4P, phosphatidylinositol-4-phosphate; RIP11, RAB11-interacting protein; RNAi, RNA interference; SER, smooth endoplasmic reticulum; She, Swi5-dependent HO expression; Vac, vacuole-related.
